# Supplementary material
Source: PubMed Central journal article supplement (PMC6483511)
Supplement: jciinsight-4-121887-s152.pdf [file jciinsight-4-121887-s152.pdf]

**The E3 ligase Hrd1 stabilizes regulatory T-cells by antagonizing inflammatory cytokine-induced ER stress response**

Yuanming Xu <sup>1</sup>, Johanna Melo-Cardenas<sup>1</sup>, Yana Zhang <sup>1</sup>, Hongjian Jin<sup>2</sup>, Isabella Gau<sup>1</sup> Juncheng Wei<sup>1</sup>, Elena Montauti<sup>1</sup>, Yusi Zhang<sup>1</sup>, Beixue Gao<sup>1</sup>, Zhaolin Sun<sup>3</sup> Sang-Myeong Lee<sup>4</sup> and Deyu Fang<sup>1,3</sup>

**Supplementary Figures 1-9 and legends:**

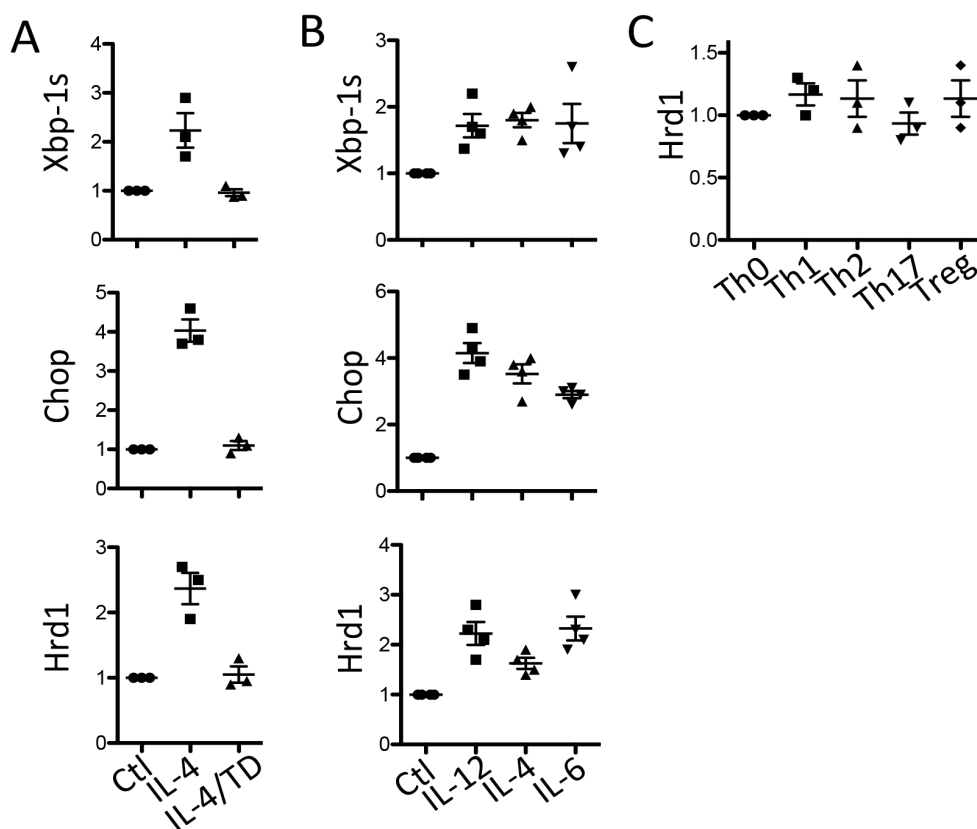

**Supplementary Figure 1. Analysis of ER stress responsive gene expression in Tregs. (A)** Tregs were cultivated with IL-4 or further with the ER stress inhibitor TD for two days, the expression of ER stress responsive genes including Xbp-1s, Chop and Hrd1 was analyzed by real-time RT-PCR. **(B)** Tregs were cultivated with or without each indicated cytokines for two days, the expression of ER stress responsive genes including Xbp-1s, Chop and Hrd1 was analyzed by real-time RT-PCR. **(C)** The expression levels of Hrd1 in polarized Th0, Th1, Th2, Th17 and Tregs was analyzed by real-time RT-PCR. Data are shown as mean  $\pm$  SD. Student t test was used for the statistical analysis: \*p<0.05 ; \*\*p<0.01 and \*\*\* p<0.001.

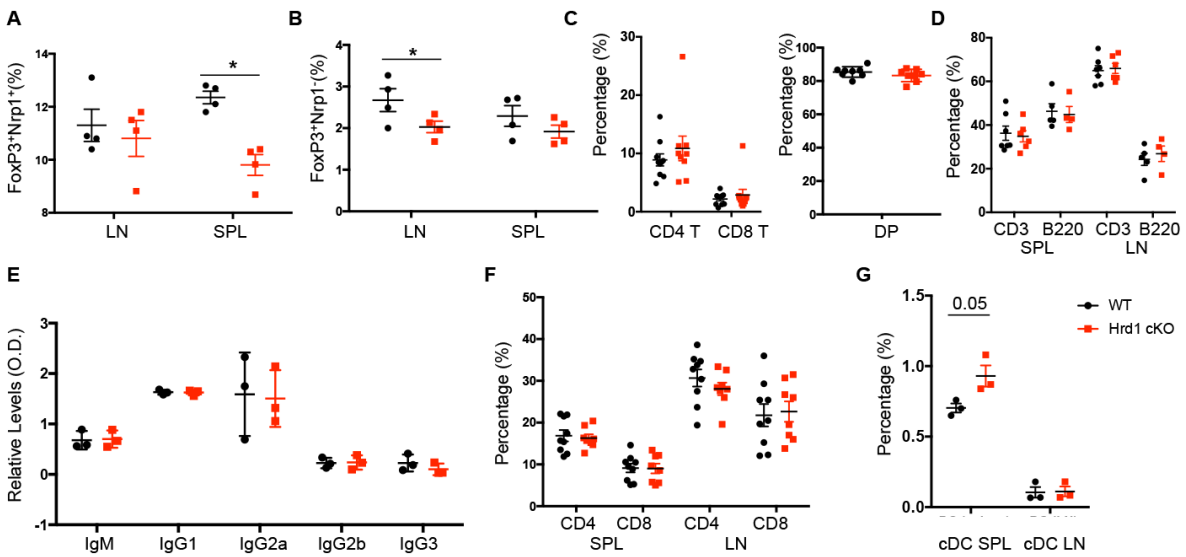

**Supplementary Figure 2. Analysis of immune cells in *Hrd1<sup>fl/fl</sup>-FoxP3<sup>cre</sup>* mice.** (A, B) Flow cytometry analysis of the expression of Nrp1 in CD4<sup>+</sup> cells from the pLN and SPL in WT and *Hrd1<sup>fl/fl</sup>-FoxP3<sup>cre</sup>* mice. (C) Frequencies of CD4<sup>+</sup>, CD8<sup>+</sup>, and CD4<sup>+</sup>CD8<sup>+</sup> double-positive cells in the thymus from WT and *Hrd1<sup>fl/fl</sup>-FoxP3<sup>cre</sup>* mice (n=7-9 per group). (D) Frequencies of CD3<sup>+</sup> and B220<sup>+</sup> cells in the SPL and pLN from WT and *Hrd1<sup>fl/fl</sup>-FoxP3<sup>cre</sup>* mice. (n=4-6 per group). (E) The levels of antibodies in the sera of WT and *Hrd1<sup>fl/fl</sup>-FoxP3<sup>cre</sup>* mice were analyzed by enzyme-linked immunosorbent assay (ELISA). Error bars represent data from 3 pairs of mice. (F, G) Single-cell suspensions of SPL and pLN from WT and *Hrd1<sup>fl/fl</sup>-FoxP3<sup>cre</sup>* mice were stained with CD4, CD8, CD11c, and MHCII antibodies and analyzed by flow cytometry (n=3-9 per group). Data are shown as mean  $\pm$  SD.

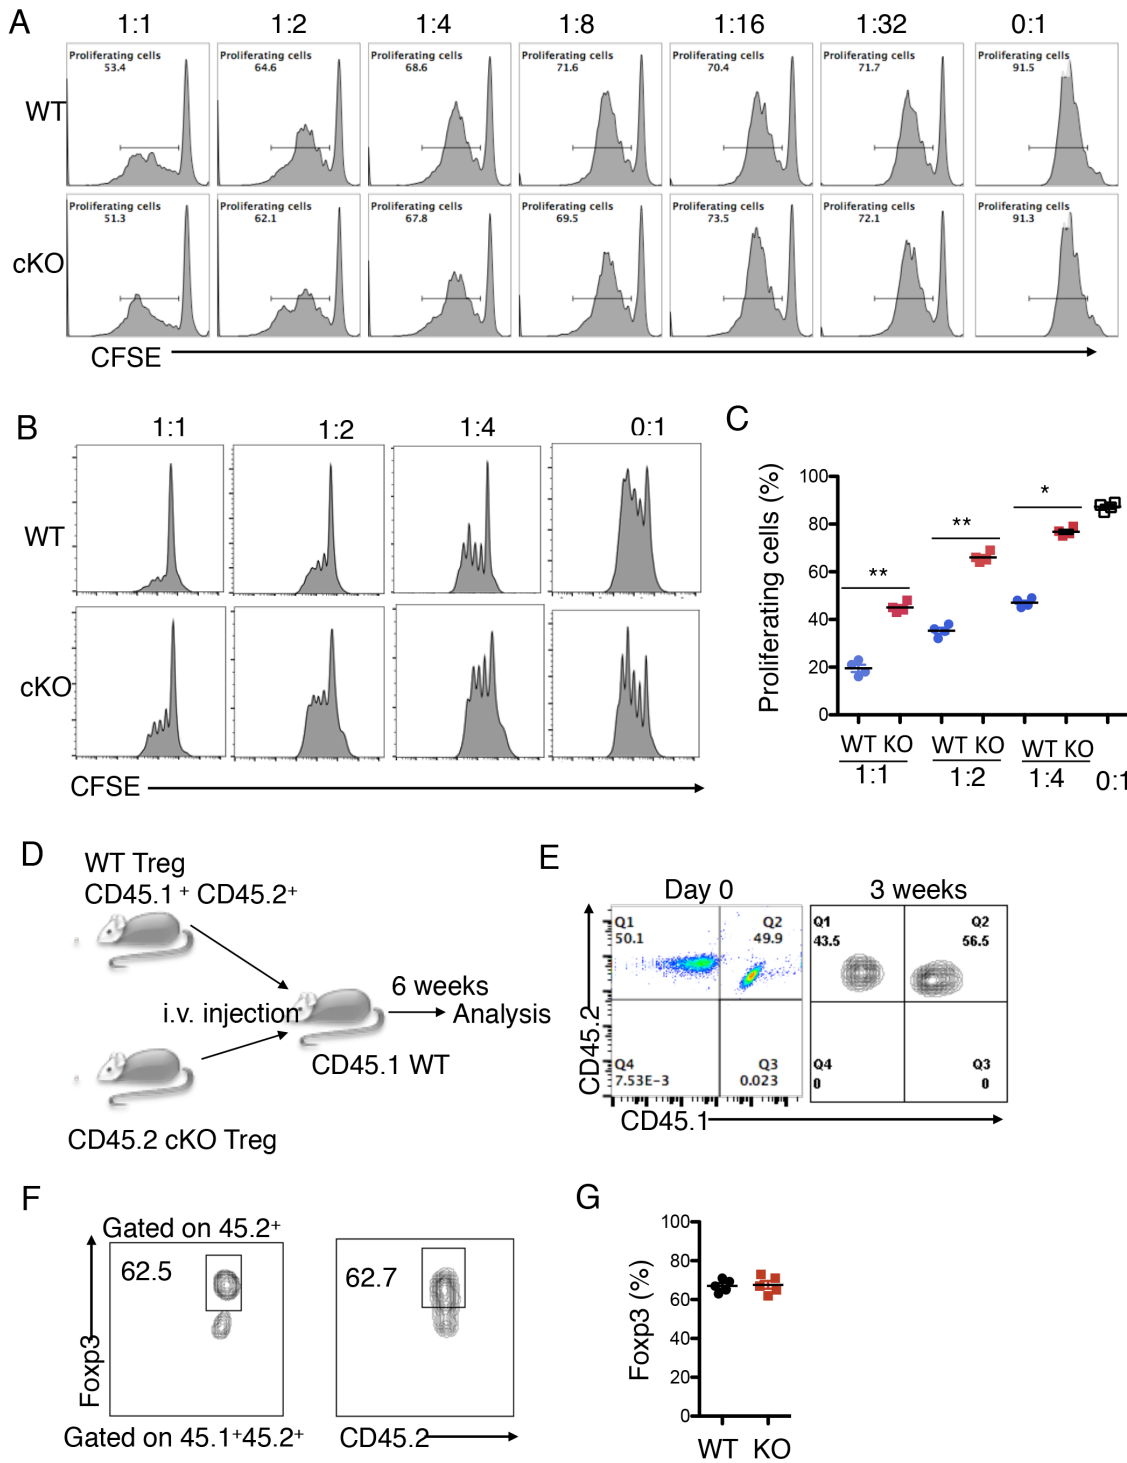

**Supplementary Figure 3: In vitro Treg suppressive activity analysis.** (A) Tregs sorted from WT and Hrd1 cKO mice were cocultivated with CFSE prestained WT naïve CD4 T cells at each indicated ratio in the presence of anti-CD3, anti-CD28 and IL-2. Three days after CD4<sup>+</sup> T cell proliferation was analyzed by flow cytometry. (B & C) In vitro Treg suppressive assay were performed in the presence of IL-4. Representative images (B) and data from three independent experiments (C) are shown. Student t test was used for the statistical analysis: \* $p < 0.05$  and \*\* $p < 0.01$ . (D-G) CD45.1<sup>+</sup>CD45.2<sup>+</sup> WT Treg and

CD45.2<sup>+</sup> Hrd1-null Tregs were co-transferred into lethally irradiated CD45.1<sup>+</sup> WT mice for six weeks (D). CD45.2<sup>+</sup> Tregs were gated and the expression levels of FoxP3 was analyzed (E-G). The average FoxP3<sup>+</sup> CD45.2<sup>+</sup>CD45.1<sup>+</sup> WT and CD45.2<sup>+</sup>CD45.1<sup>-</sup> Hrd1-null Tregs were analyzed. Representative images (F) and data from 5 mice (G) are shown. Data are shown as mean  $\pm$  SD.

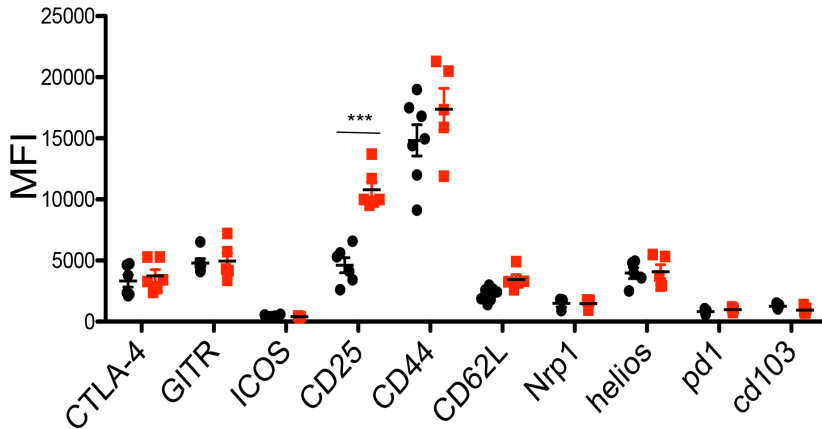

**Supplementary Figure 4. Expression profiles of Treg-specific molecules in the pLN.** Mean fluorescence intensity of CD25, CD44, CD62L, CD103, ICOS, GITR, Helios, CTLA4, Nrp1, and PD-1 in Treg from the pLN of WT and Hrd1<sup>fl/fl</sup>-FoxP3<sup>cre</sup> mice (n=5-7 per group). Data are shown as mean  $\pm$  SD.

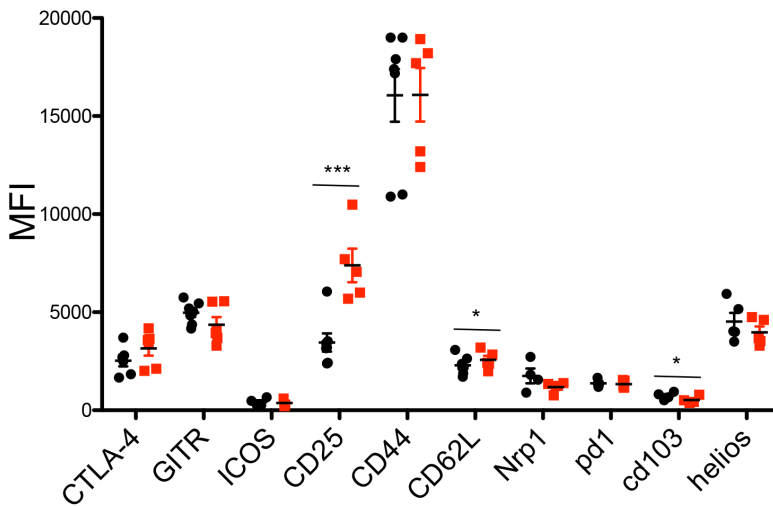

**Supplementary Figure 5. The expression profiles of Treg specific molecules in the SPL.** Mean fluorescence intensity of CD25, CD44, CD62L, CD103, ICOS, GITR, Helios, CTLA4, Nrp1, and PD-1 in Treg from the SPL of WT and Hrd1<sup>fl/fl</sup>-FoxP3<sup>cre</sup> mice (n=5-7 per group). Data are shown as mean  $\pm$  SD.

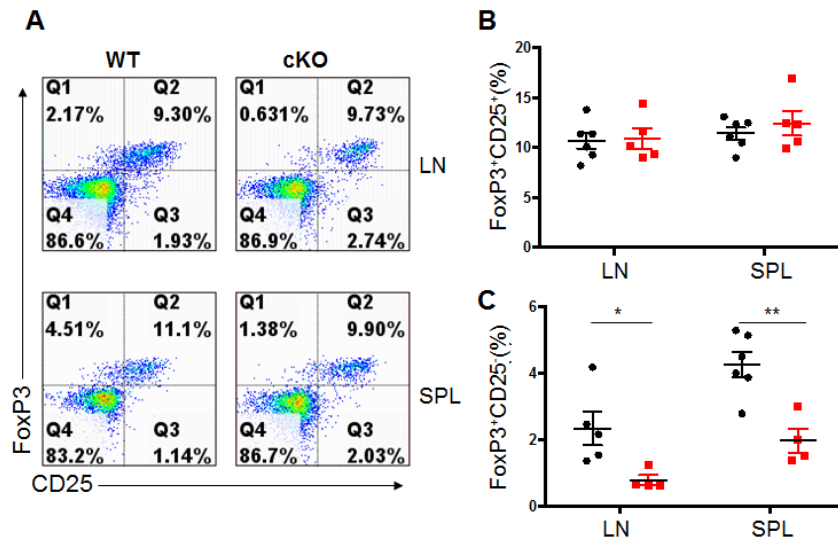

**Supplementary Figure 6. Reduced FoxP3<sup>+</sup>CD25<sup>-</sup> population in Hrd1<sup>fl/fl</sup>-FoxP3<sup>cre</sup> mice.** CD4<sup>+</sup> T cells were gated, the levels of CD25 and FoxP3 were analyzed. **(A)** Representative images and **(B-D)** data of FoxP3<sup>+</sup>CD25<sup>+</sup> (B) and FoxP3<sup>+</sup>CD25<sup>-</sup> expression in Treg from the SPL and pLN in WT and Hrd1<sup>fl/fl</sup>-FoxP3<sup>cre</sup> mice (n=4-6 per group). Student t test was used for the statistical analysis: \*p<0.05 and \*\*p<0.01.

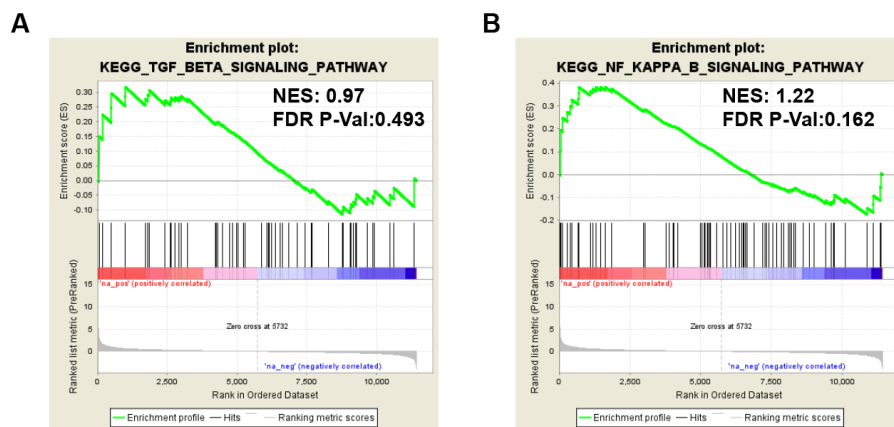

**Supplementary Figure 7. GSEA of iTreg and nTreg in WT and Hrd1<sup>fl/fl</sup>-FoxP3<sup>cre</sup> mice.** **(A-B)** GSEA of the TGFβ signaling pathway and NF-κB in WT and Hrd1<sup>fl/fl</sup>-FoxP3<sup>cre</sup> TGFβ-converted iTreg (n=3 per group).

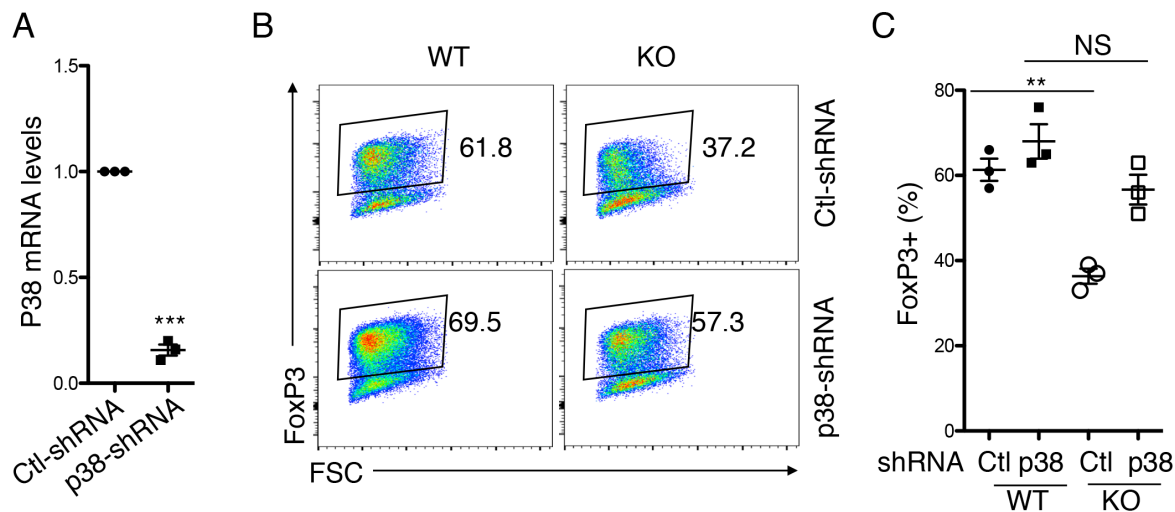

**Supplementary Figure 8. P38 suppression by sh-RNA on Hrd1-null Treg polarization.** CD4<sup>+</sup> T cells were infected with lenti virus that carrying control or p38-specific shRNA. **(A)** the mRNA levels of p38 in GFP<sup>+</sup> cells were analyzed by real-time RT-PCR. **(B & C)** Cells were cultivated in Treg polarization condition with 1 ng/ml TGF- $\beta$  during and after infection. FoxP3<sup>+</sup> cells were analyzed. Data are shown as mean  $\pm$  SD. Student t test was used for the statistical analysis: \* $p < 0.05$ ; \*\* $p < 0.01$  and \*\*\* $p < 0.001$ .

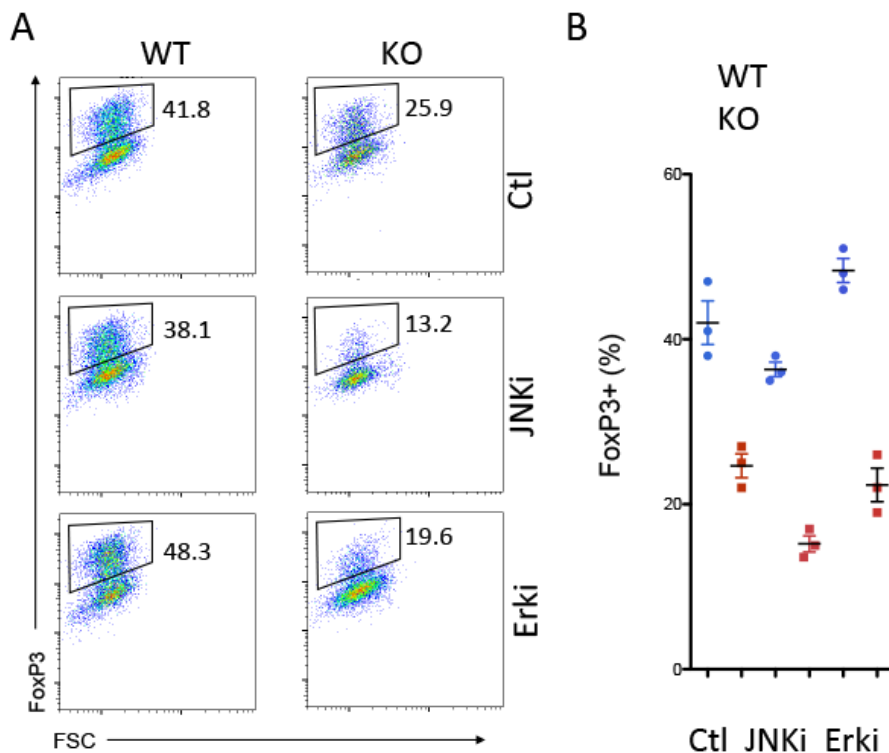

**Supplementary Figure 9. JNK and Erk suppression on Hrd1-null Treg polarization.** WT and Hrd1-null Tregs were cultivated with JNK-specific inhibitor SP600125 (20  $\mu$ M) or with Erk inhibitor II (FR180204, 2  $\mu$ M). FoxP3<sup>+</sup> cells were determined by intracellular staining. Representative images (A) and data from four independent experiment are shown.
